# Supplementary material
Source: PubMed Central journal article supplement (PMC7686128)
Supplement: NIHMS1634970-supplement-1.pdf [file NIHMS1634970-supplement-1.pdf]

## Supplemental Figure 1

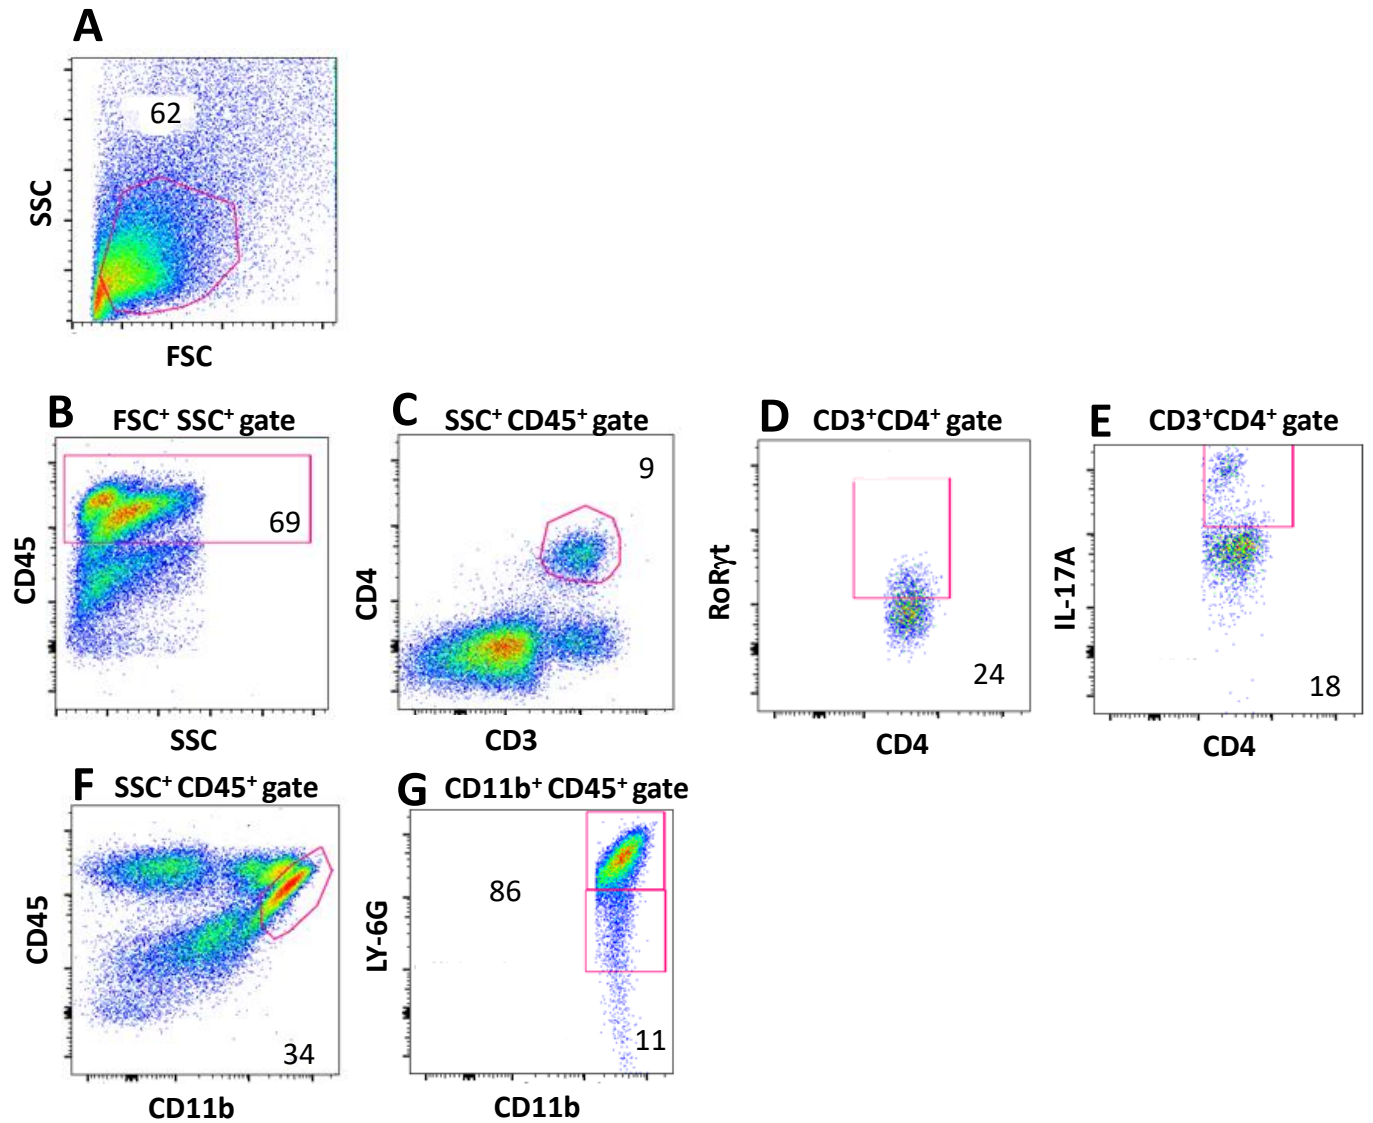

**SUPPLEMENTAL FIGURE 1.** Representative plots showing the gating strategy adopted for the step by step analysis of different immune cell subsets in the lung. Total lung leukocytes were gated based on (A) FSC-SSC and (B) subsequently by SSC-CD45<sup>+</sup> gate. (C) SSC-CD45<sup>+</sup> population were further gated for CD3<sup>+</sup>CD4<sup>+</sup> T cells which were subsequently gated for (D) CD4<sup>+</sup>ROR $\gamma$ t<sup>+</sup> and (E) CD4<sup>+</sup>IL-17A<sup>+</sup> T cells. (F) For quantifying neutrophils, SSC-CD45<sup>+</sup> population were gated for CD45<sup>+</sup>CD11b<sup>+</sup> cells to subsequently gate for (G) CD11b<sup>+</sup>LY-6G<sup>+</sup> neutrophils.

## Supplemental Table 1

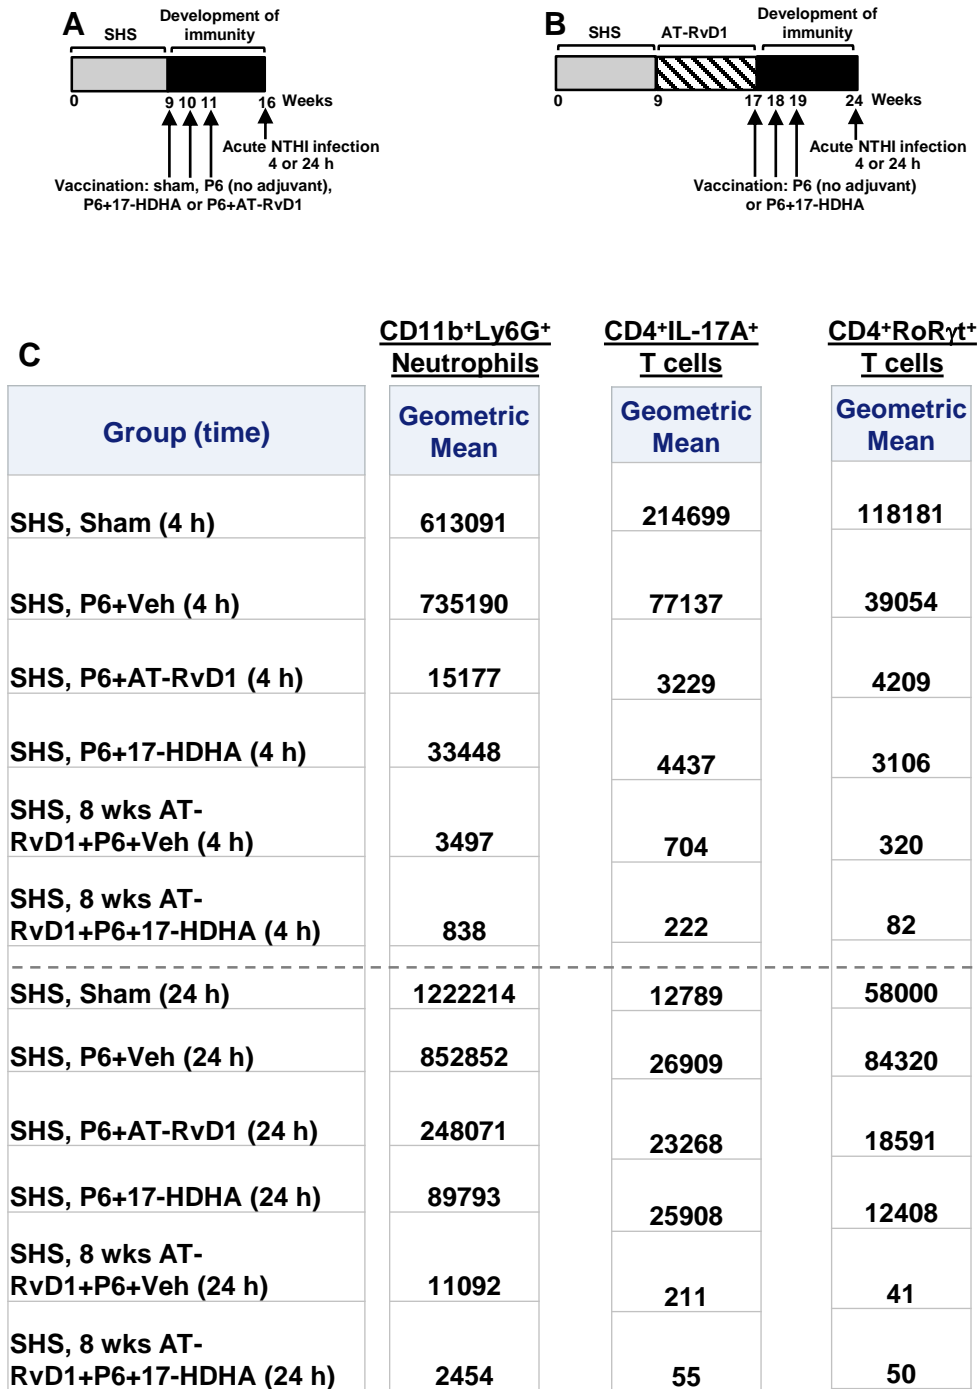

**SUPPLEMENTAL Table 1.** The table represents experimental schema (A,B) and geometric mean values (C) of various markers under study at 4 and 24 h time points post acute NTHI infection in SHS-exposed, P6 vaccinated mice. n=5 mice per group/time point. The statistical methods employed are provided in the methods section in the main text. Markers under study were CD11b<sup>+</sup>Ly6G<sup>+</sup> Neutrophils, CD4<sup>+</sup>IL-17A<sup>+</sup> Th17 T cells and CD4<sup>+</sup>RoRγt<sup>+</sup> Th17 T cells.
